# Supplementary material for: A BODIPY/pyrene-based chemodosimetric fluorescent chemosensor for selective sensing of hydrazine in the gas and aqueous solution state and its imaging in living cells
Source: Royal Society of Chemistry journal article supplement (doi:10.1039/c5ra10198k), 2015-01-01
Supplement: c5ra10198k1.pdf [file c5ra10198k1.pdf]

## Supporting Information

**For**

**A BODIPY/pyrene-based chemodosimetric fluorescent chemosensor for selective sensing of hydrazine in the gas and aqueous solution state and its imaging in living cells**

Ajit Kumar Mahapatra,<sup>\*a</sup> Rajkishor Maji,<sup>a</sup> Kalipada Maiti,<sup>a</sup> Saikat Kumar Manna,<sup>a</sup> Sanchita Mondal,<sup>a</sup> Syed Samim Ali,<sup>a</sup> Srimanta Manna,<sup>a</sup> Prithidipa Sahoo,<sup>b</sup> Sukhendu Mandal,<sup>c</sup> Md Raihan Uddin <sup>c</sup> and Debasish Mandal <sup>d</sup>

<sup>a</sup>Department of Chemistry, Indian Institute of Engineering Science and Technology, Shibpur, Howrah – 711103, India.

<sup>b</sup>Department of Chemistry, Visva-Bharati (A Central University), Santiniketan 731235, India.

<sup>c</sup> Department of Microbiology, University of Calcutta, Kolkata-700019, India.

<sup>d</sup> Institute of Chemistry, The Hebrew University of Jerusalem, 91904 Jerusalem, Israel.

## Table of Contents:

|                                                                                                                                                         |         |
|---------------------------------------------------------------------------------------------------------------------------------------------------------|---------|
| 1. <sup>1</sup> H NMR of Compound ( <b>2</b> )                                                                                                          | S3      |
| 2. ESI LCMS [M+1] <sup>+</sup> spectrum of Compound ( <b>2</b> )                                                                                        | S4      |
| 3. <sup>1</sup> H NMR of Compound ( <b>BPB</b> )                                                                                                        | S4      |
| 4. Expansion spectrum of <sup>1</sup> H NMR of Compound ( <b>BPB</b> )                                                                                  | S5      |
| 5. TOF MS ES <sup>+</sup> mass spectrum of Compound ( <b>BPB</b> )                                                                                      | S6      |
| 6. <sup>13</sup> C NMR spectrum of Compound ( <b>BPB</b> )                                                                                              | S7      |
| 7. Effects of water composition on the fluorescence of (a) <b>BPB</b> , (b) <b>BPB</b> in the presence of hydrazine, and (c) their plot in aqueous DMSO | S8      |
| 8. ESI LCMS spectra of <b>BPB</b> + N <sub>2</sub> H <sub>4</sub>                                                                                       | S9      |
| 9. Calculations for detection limit                                                                                                                     | S9      |
| 10. Calibration curve for fluorescence titration of <b>BPB</b> with hydrazine                                                                           | S9      |
| 11. Competition Fluorescence experiments for a <b>BPB</b> -hydrazine system in the presence of coexisting (a) amines/anions and (b) cations             | S10     |
| 12. UV-vis and fluorescence spectral change of compound ( <b>2</b> ) with hydrazine                                                                     | S11     |
| 13. UV-vis and fluorescence spectral change of $\gamma$ -oxo-1-pyrenebutyric acid with hydrazine                                                        | S11     |
| 14. Influences of pH on the emission spectra of <b>BPB</b>                                                                                              | S12     |
| 15. Computational Study                                                                                                                                 | S12-S17 |

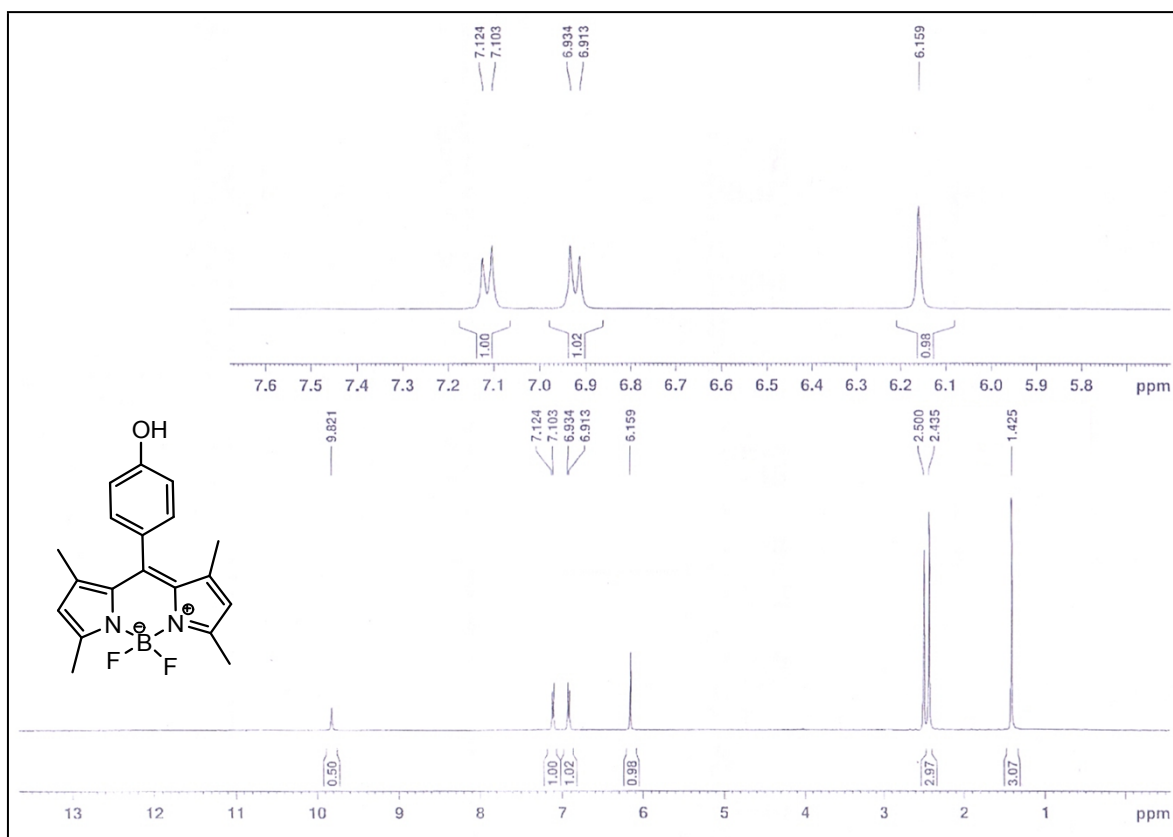

**Figure S1.** <sup>1</sup>H NMR of **Compound (2)** (d<sub>6</sub>-DMSO, 400 MHz).

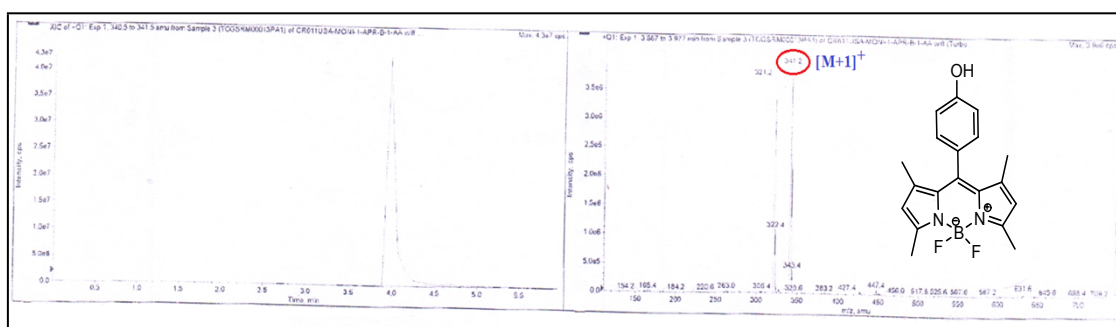

**Figure S2.** ESI LCMS  $[M+1]^+$  spectrum of **Compound (2)**.

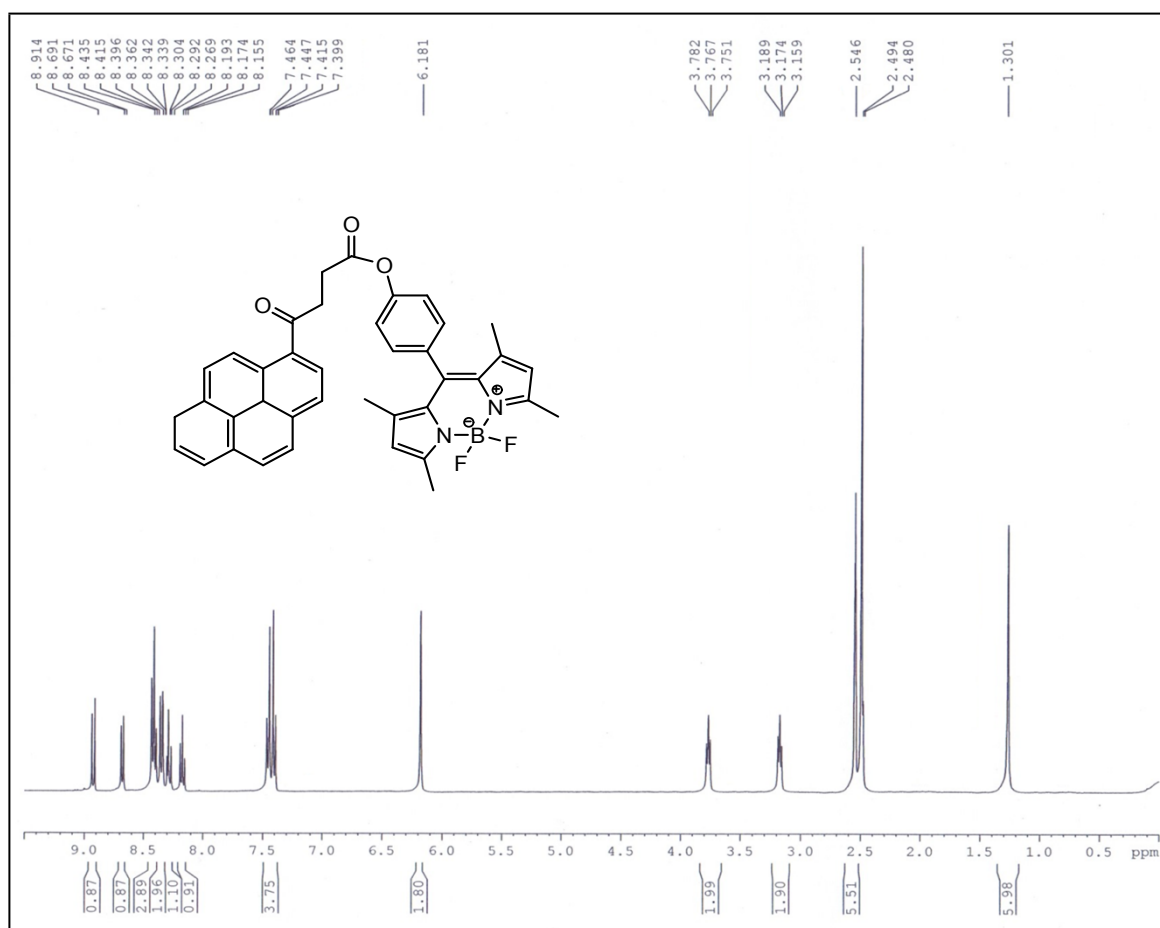

**Figure S3.**  $^1\text{H}$  NMR of **Compound (BPB)** ( $d_6$ -DMSO, 400 MHz).

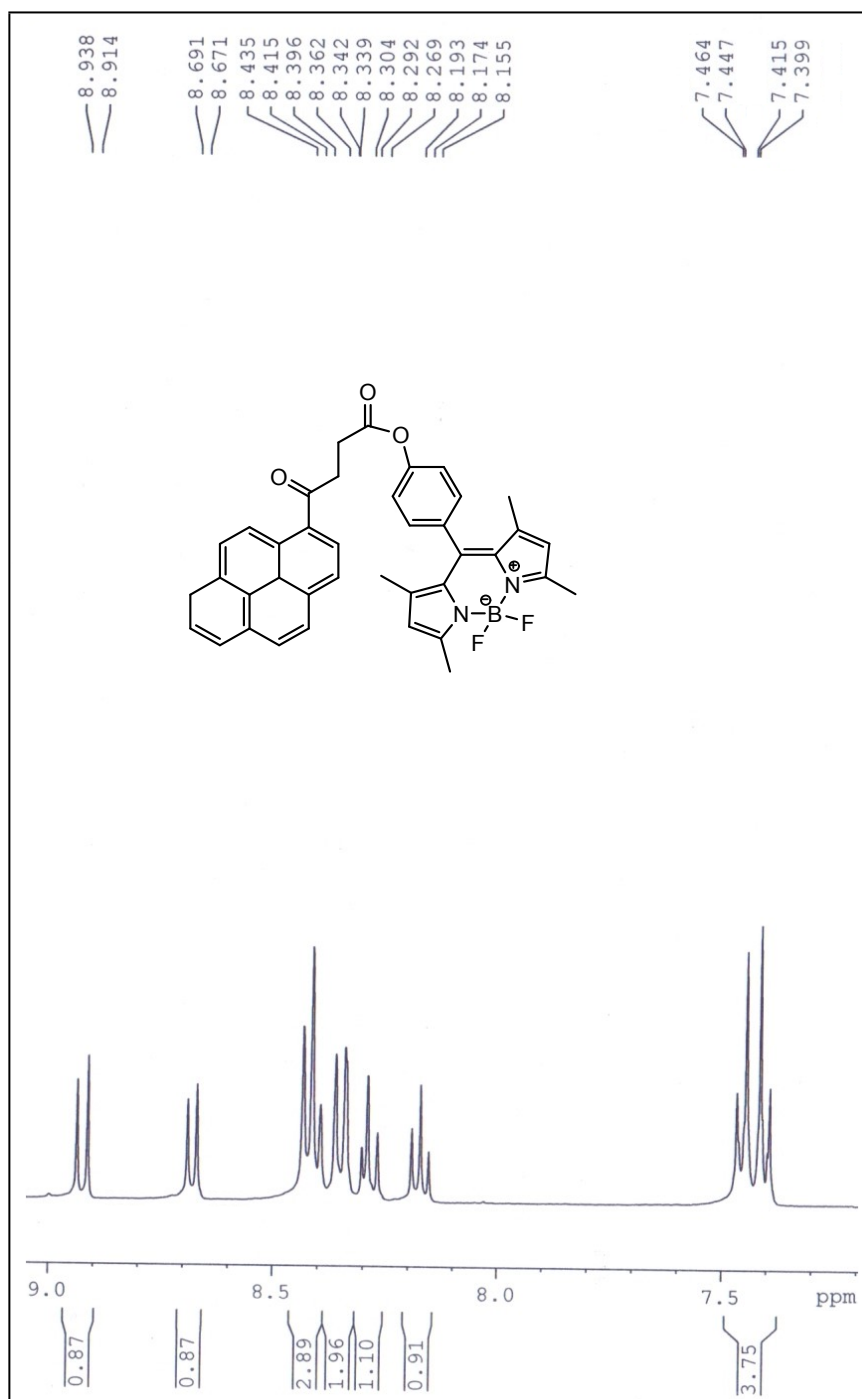

**Figure S4.** Expansion spectrum of <sup>1</sup>H NMR of **Compound (BPB)** (d<sub>6</sub>-DMSO, 400 MHz).

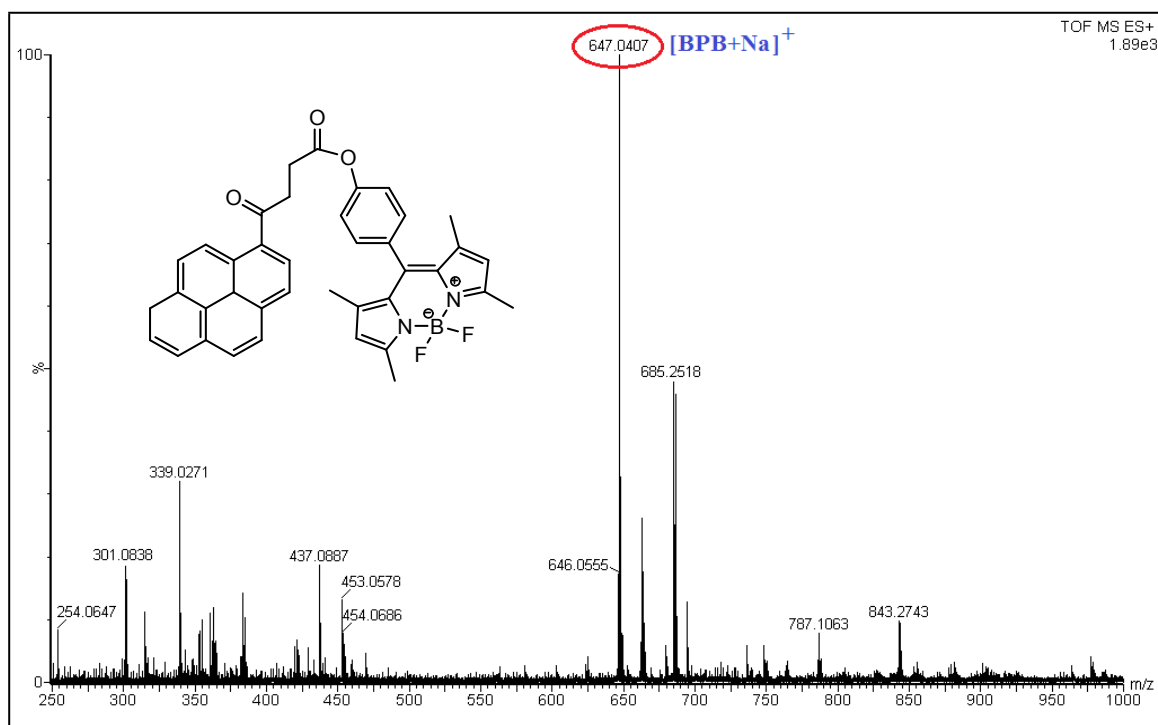

**Figure S5.** TOF MS ES+ mass spectrum of Compound (BPB).

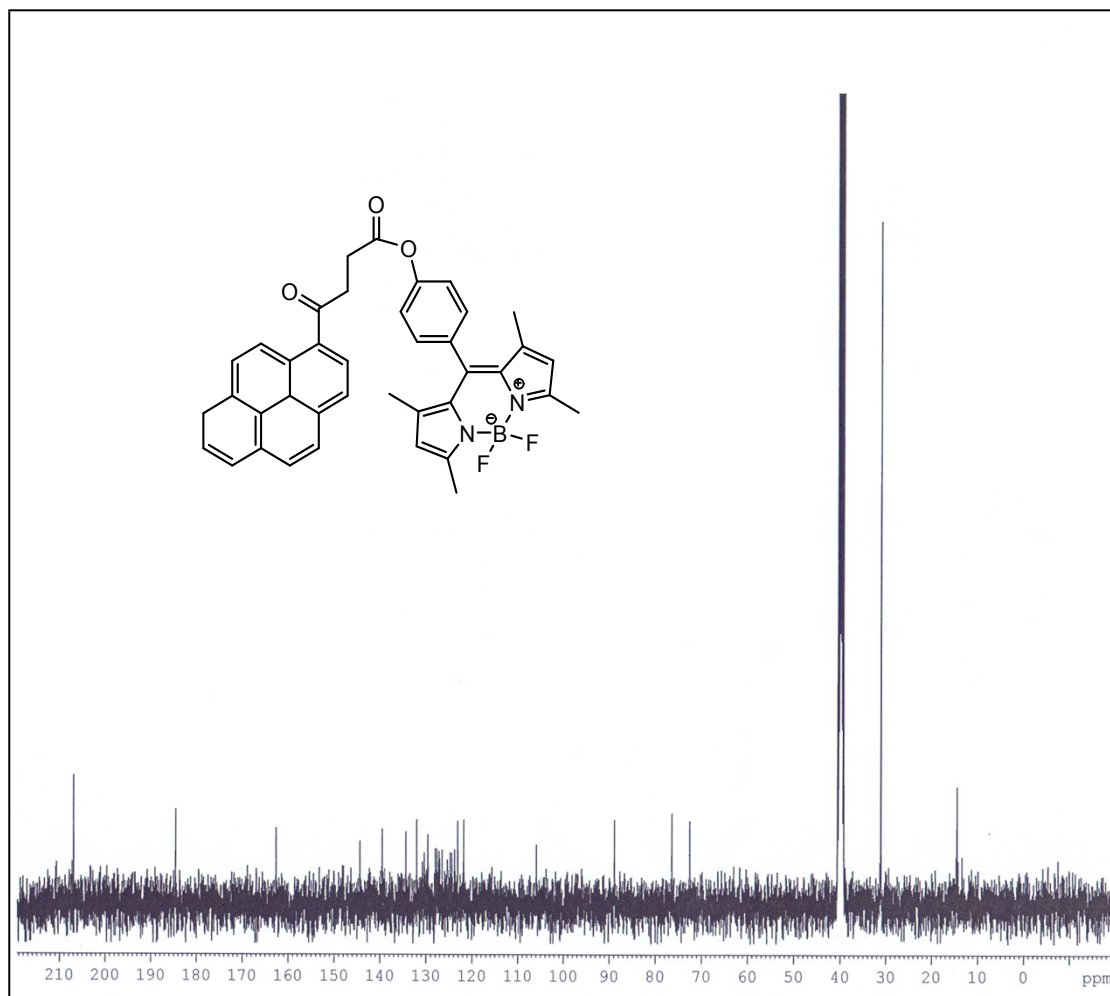

**Figure S6.** <sup>13</sup>C NMR spectrum of **Compound (BPB)** (d<sub>6</sub>-DMSO, 100 MHz).

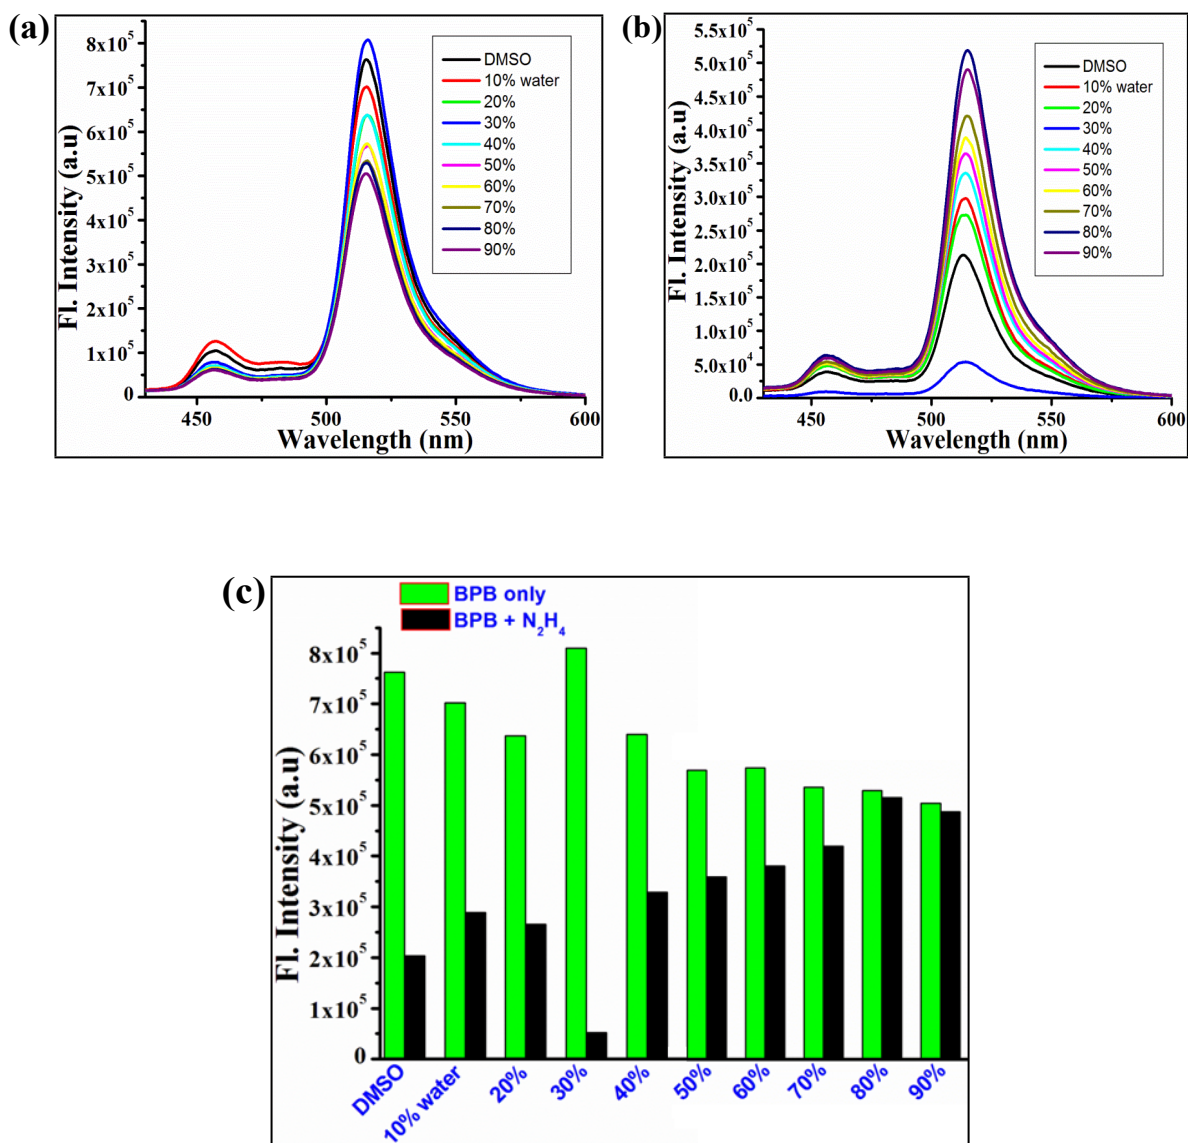

**Figure S7.** Effects of water composition on the fluorescence of (a) **BPB**, (b) **BPB** in the presence of hydrazine, and (c) their plot in aqueous DMSO.



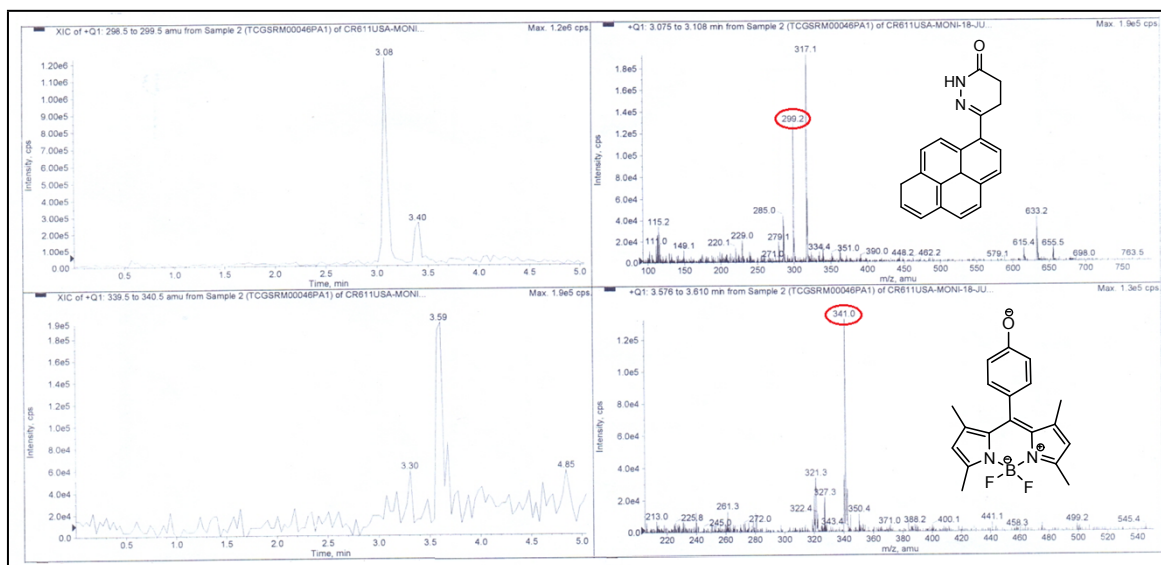

**Figure S8.** ESI LCMS spectra of **BPB**+  $N_2H_4$ .

### Calculations for detection limit

The detection limit (DL) of **BPB** for hydrazine was determined from the following equation:

$$DL = K * Sb1/S$$

Where K = 2 or 3 (we take 2 in this case); Sb1 is the standard deviation of the blank solution; S is the slope of the calibration curve.

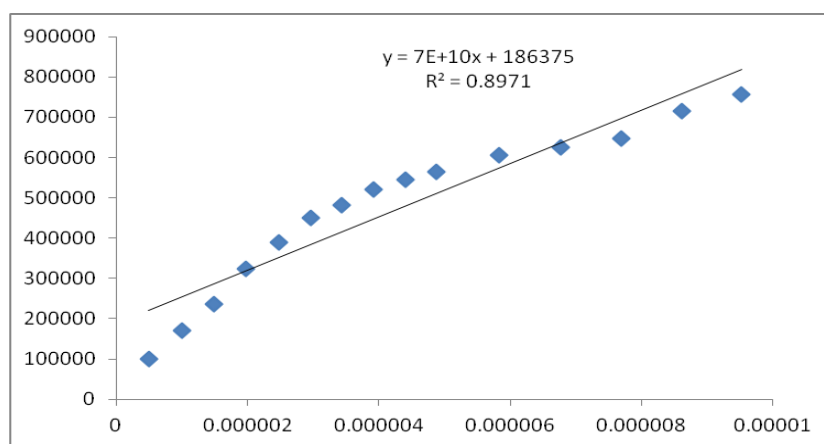

**Figure S9.** Calibration curve for fluorescence titration of **BPB** with hydrazine.

From the graph we get slope (S) =  $7 \times 10^{10}$ . Standard deviation (Sb1=65536.8123)

Thus using the formula we get the detection limit = 1.87  $\mu M$ .

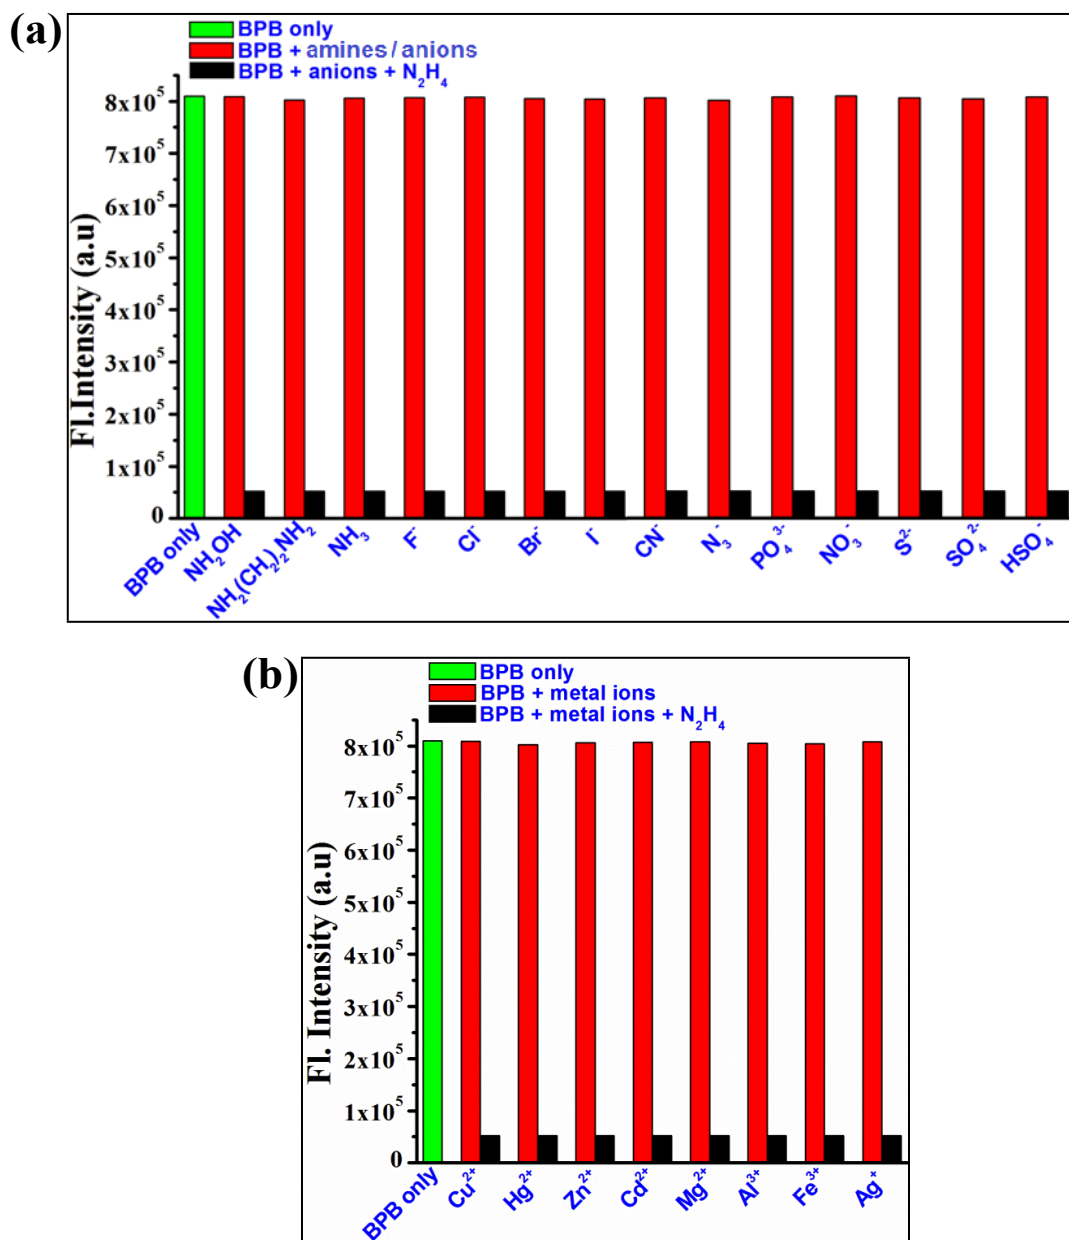

**Figure S10.** Competition Fluorescence experiments for a BPB-hydrazine system in the presence of coexisting (a) amines/anions and (b) cations. [BPB] =  $1 \times 10^{-5}$  M, 2.0 equiv. of hydrazine ( $c = 2 \times 10^{-4}$  M) and 30 equiv of common anions and cations, redox anions and amines ( $c = 2 \times 10^{-4}$  M) in  $H_2O$ -DMSO (3:7, v/v) solution (10 mM HEPES buffer, pH 7.4).

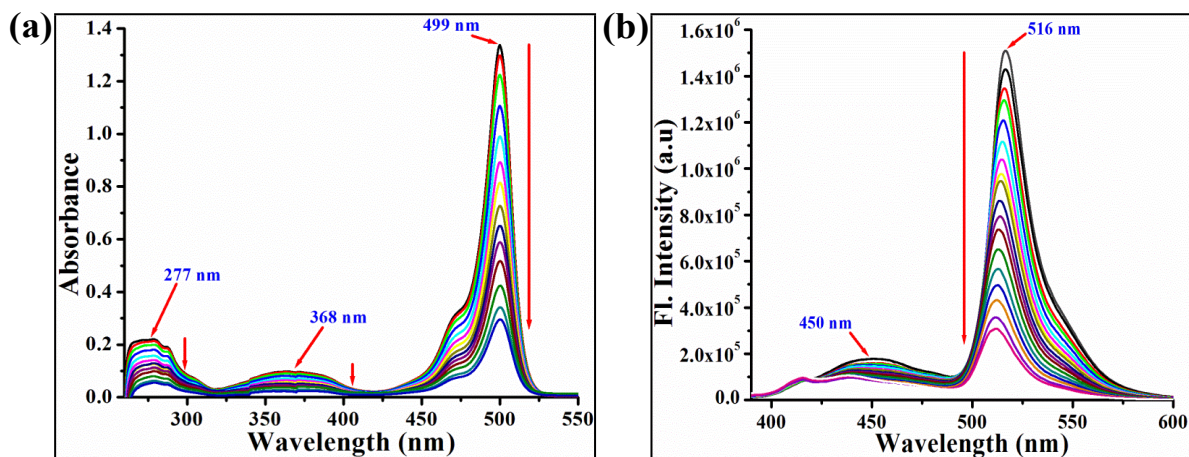

**Figure S11.** (a) Changes in the UV/vis absorption spectra of compound-2 ( $c = 2 \times 10^{-5}$  M) in H<sub>2</sub>O–DMSO (3:7, v/v) solution (10 mM HEPES buffer, pH 7.4) in the presence of 0 – 10.0 equiv. of hydrazine and (b) Fluorescence spectra (excitation at 368 nm) of compound-2 ( $c = 2 \times 10^{-5}$  M) in H<sub>2</sub>O–DMSO (3:7, v/v) solution (10 mM HEPES buffer, pH 7.4) in the presence of 0 – 10.0 equiv. of hydrazine.

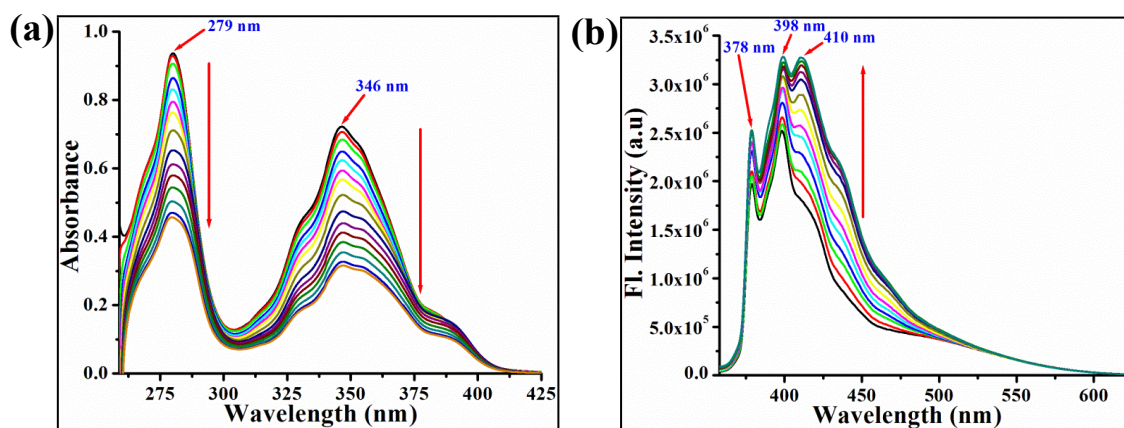

**Figure S12.** (a) Changes in the UV/vis absorption spectra of  $\gamma$ -oxo-1-pyrenebutyric acid ( $c = 2 \times 10^{-5}$  M) in H<sub>2</sub>O–DMSO (3:7, v/v) solution (10 mM HEPES buffer, pH 7.4) in the presence of 0 – 20.0 equiv. of hydrazine and (b) Fluorescence spectra (excitation at 346 nm) of  $\gamma$ -oxo-1-pyrenebutyric acid ( $c = 2 \times 10^{-5}$  M) in H<sub>2</sub>O–DMSO (3:7, v/v) solution (10 mM HEPES buffer, pH 7.4) in the presence of 0 – 20.0 equiv. of hydrazine.

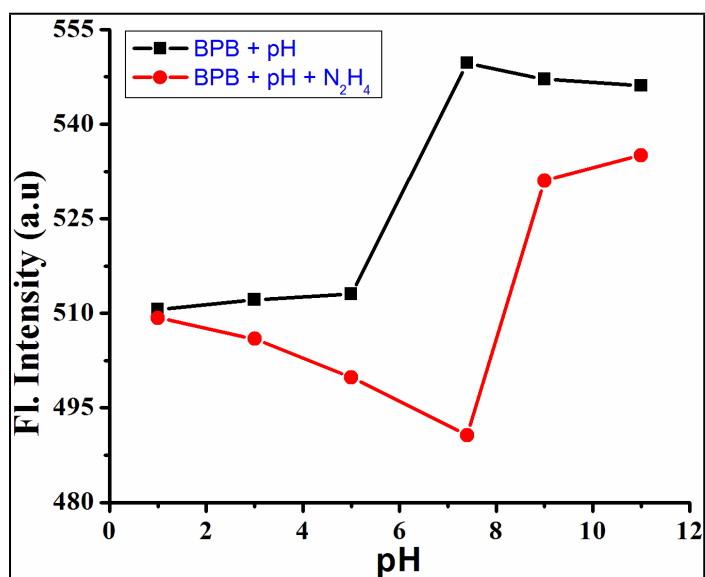

**Figure S13.** Fluorescence pH titration of **BPB** ( $1.0 \times 10^{-5}$  M) in presence (red) and absence (black) of 2.0 equiv. of hydrazine ( $c = 2 \times 10^{-4}$  M) at 516 nm in H<sub>2</sub>O–DMSO (3:7, v/v) solution.

### Computational Method

All the geometries have been optimized at the B3LYP density functional method with 6-31G(d,p) basis set for all atom. A polarizable continuum model (PCM) has been employed to take into account the influence of water as a solvent during optimization. The geometries are verified as proper minima by frequency calculations. To further refine the energy and optical properties single point population analysis and time-dependent density functional theory (TDDFT) calculations have also been performed using triple  $\zeta$  quality 6-311G(d,p) basis set. All calculations have been performed using Gaussian03 program. All the data presented here are calculated in solvent phase.

**Table S1.** Selected electronic excitation energies (eV), oscillator strengths (f), main configurations, and CI Coefficients of the low-lying excited states of sensor **BPB**, **3** and **4**. The data were calculated at the TDB3LYP/6-311G(d,p)//B3LYP/6-31G(d,p) level of theory.

| Molecules  | Electronic Transition            | Excitation Energy <sup>a</sup> | f <sup>b</sup> | Composition <sup>c</sup>            | (composition) % |
|------------|----------------------------------|--------------------------------|----------------|-------------------------------------|-----------------|
| <b>BPB</b> | S <sub>0</sub> → S <sub>1</sub>  | 2.9040 eV 426.94 nm            | 0.5740         | H → L                               | 98.0            |
|            | S <sub>0</sub> → S <sub>4</sub>  | 3.1580 eV 392.60 nm            | 0.5401         | H-1 → L+1                           | 94.6            |
|            | S <sub>0</sub> → S <sub>18</sub> | 4.2964 eV 288.57 nm            | 0.2634         | H-1 → L+3<br>H-2 → L+2              | 71.2            |
|            | S <sub>0</sub> → S <sub>28</sub> | 4.8553 eV 255.36 nm            | 0.4601         | H-9 → L                             | 86.2            |
|            | S <sub>0</sub> → S <sub>47</sub> | 5.5001 eV 225.42 nm            | 0.3664         | H-2 → L+5<br>H-12 → L+1             | 61.9            |
| <b>4</b>   | S <sub>0</sub> → S <sub>1</sub>  | 3.2138 eV 385.79 nm            | 0.6140         | H → L                               | 95.6            |
|            | S <sub>0</sub> → S <sub>4</sub>  | 4.1665 eV 297.57 nm            | 0.2843         | H-1 → L                             | 34.8            |
|            | S <sub>0</sub> → S <sub>14</sub> | 5.2876 eV 234.48 nm            | 0.7580         | H-2 → L+1<br>H-1 → L+1<br>H-1 → L+2 | 75.4            |
|            | S <sub>0</sub> → S <sub>32</sub> | 6.3831 eV 194.24 nm            | 0.3278         | H-4 → L+3<br>H-4 → L+4              | 53.4            |
|            | S <sub>0</sub> → S <sub>46</sub> | 6.9420 eV 178.60 nm            | 0.5644         | H-5 → L+3<br>H-3 → L+4<br>H-3 → L+5 | 59.1            |
| <b>3</b>   | S <sub>0</sub> → S <sub>1</sub>  | 2.1496 eV 576.79 nm            | 0.3563         | H → L                               | 100.0           |
|            | S <sub>0</sub> → S <sub>3</sub>  | 2.9351 eV 422.42 nm            | 0.4862         | H-1 → L                             | 98.6            |
|            | S <sub>0</sub> → S <sub>42</sub> | 6.6929 eV 185.25 nm            | 0.3313         | H-4 → L+1                           | 50.0            |

[a] Only selected excited states were considered. The numbers in parentheses are the excitation energy in wavelength. [b] Oscillator strength. [c] H stands for HOMO and L stands for LUMO.

**Table S2.** Energies of the highest occupied molecular orbital (HOMO) and lowest unoccupied molecular orbital (LUMO) calculated at the B3LYP/6-311G(d,p)//B3LYP/6-31G(d,p) level of theory

| Species    | $E_{\text{HOMO}}$ (a.u.) | $E_{\text{LUMO}}$ (a.u.) | $\Delta E$ (a.u.) | $\Delta E$ (eV) | $\Delta E$ (kcal/mol) |
|------------|--------------------------|--------------------------|-------------------|-----------------|-----------------------|
| <b>BPB</b> | -0.21298                 | -0.1024                  | 0.11058           | 3.0089596       | 69.4                  |
| <b>4</b>   | -0.20831                 | -0.08043                 | 0.12788           | 3.4797043       | 80.2                  |
| <b>3</b>   | -0.17653                 | -0.08759                 | 0.08894           | 2.4201196       | 55.8                  |

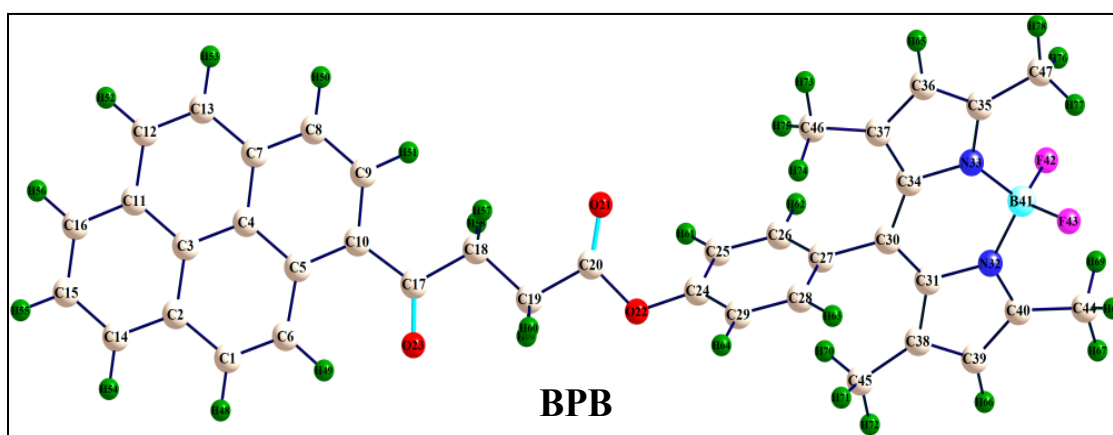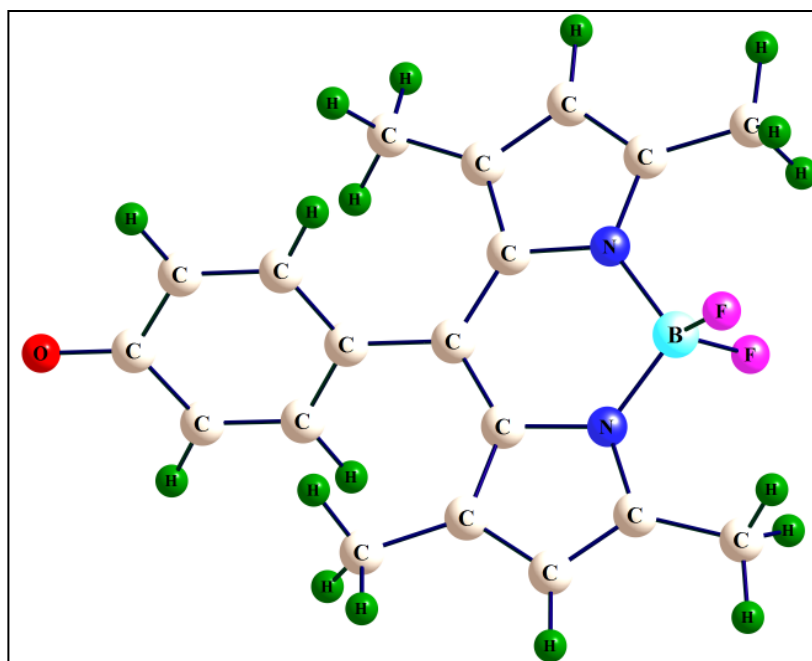

**3**

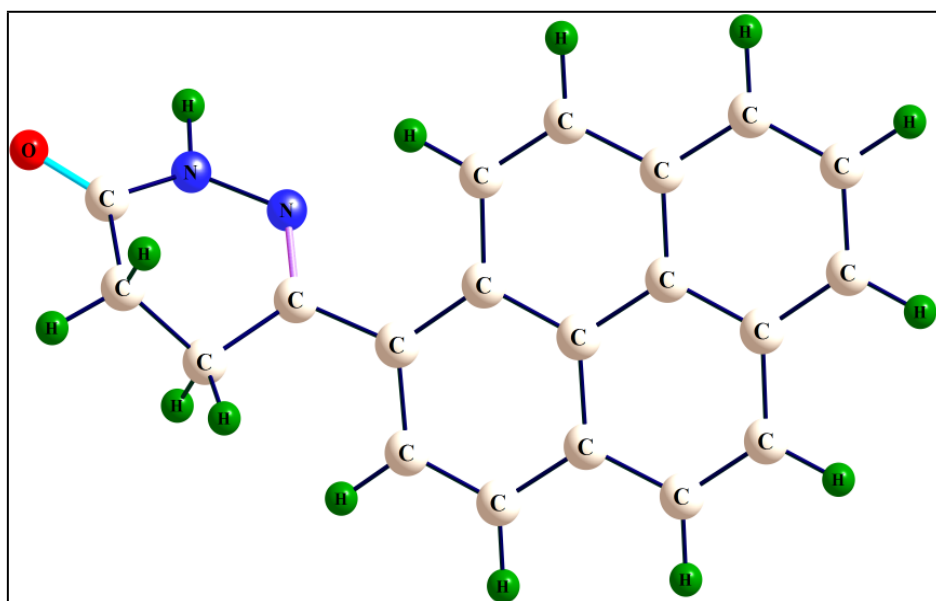

4

Figure S14. Optimized ground-state geometries of Compound (BPB), 3 and 4.

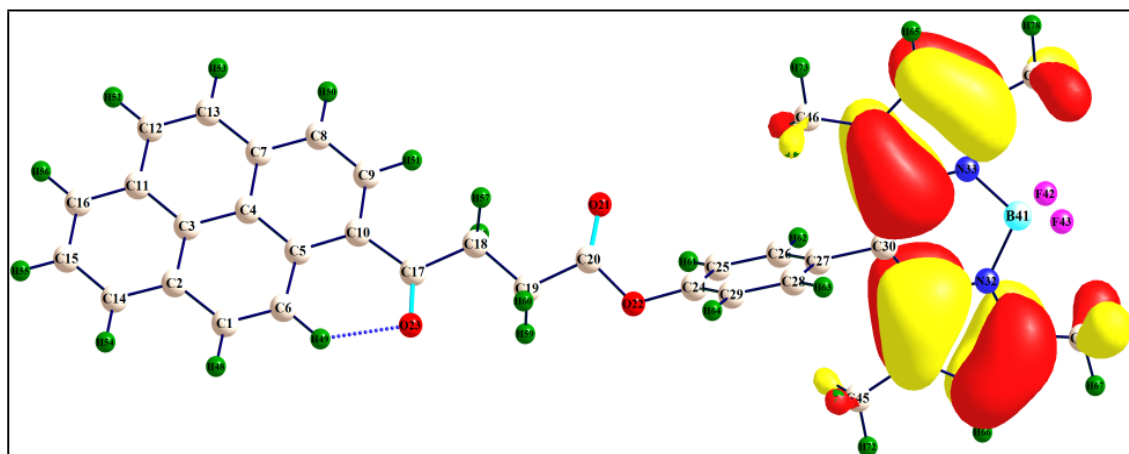

HOMO

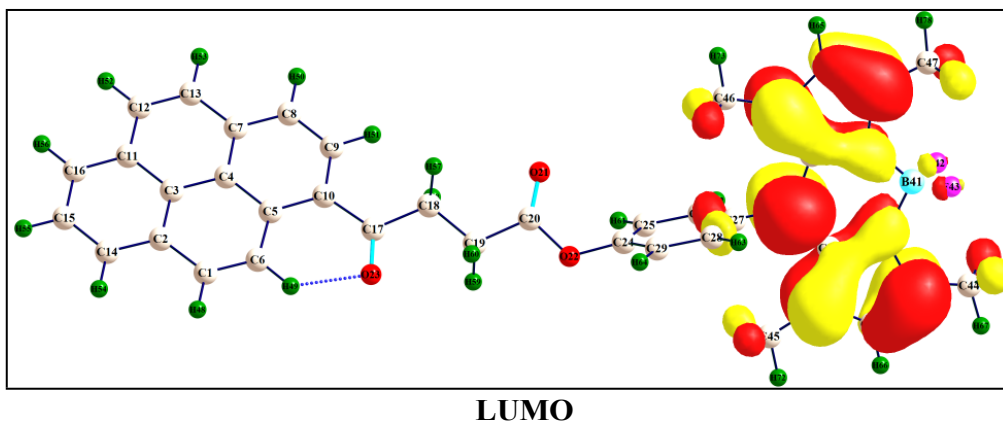

LUMO

Figure S15. Plots of the frontier orbitals of Compound (BPB).

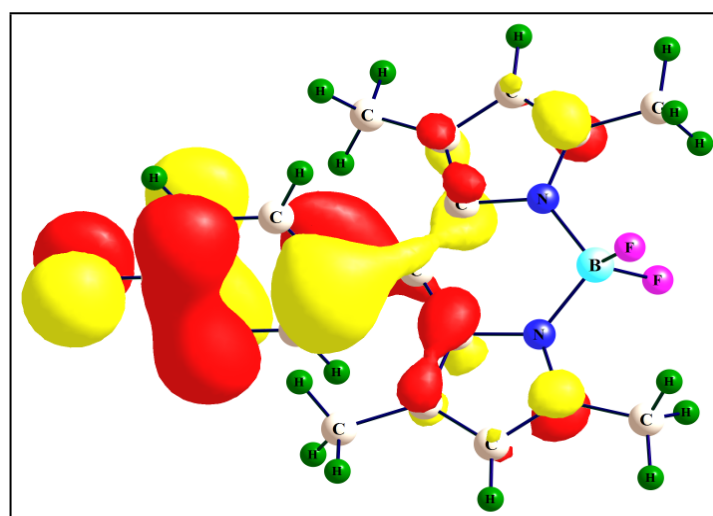

HOMO

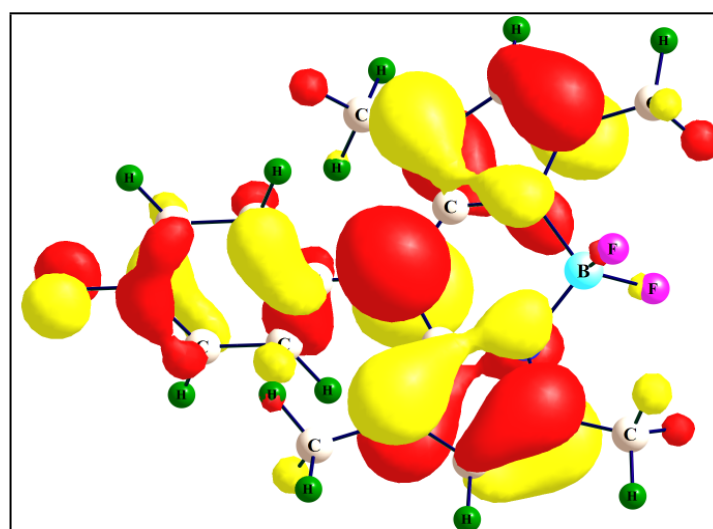

LUMO

Figure S16. Plots of the frontier orbitals of Compound (3).



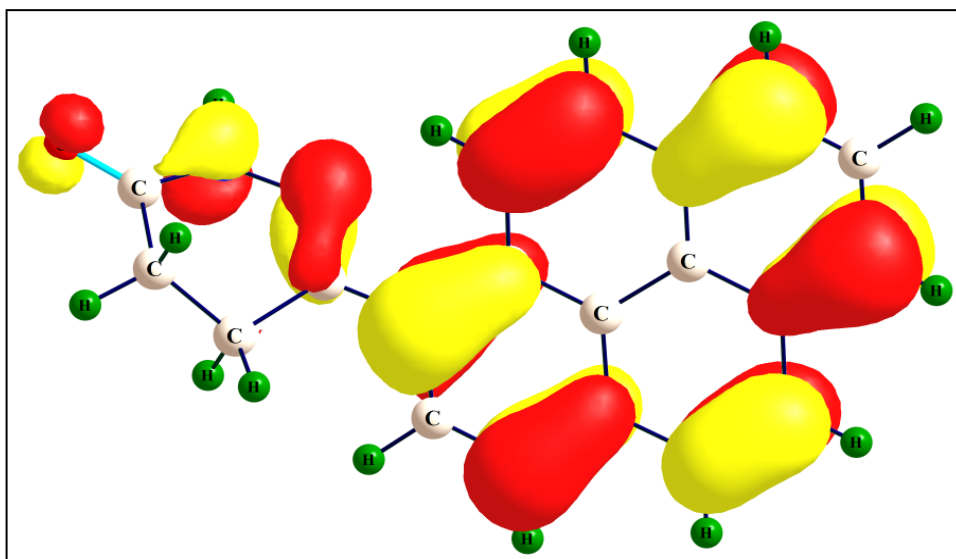

HOMO

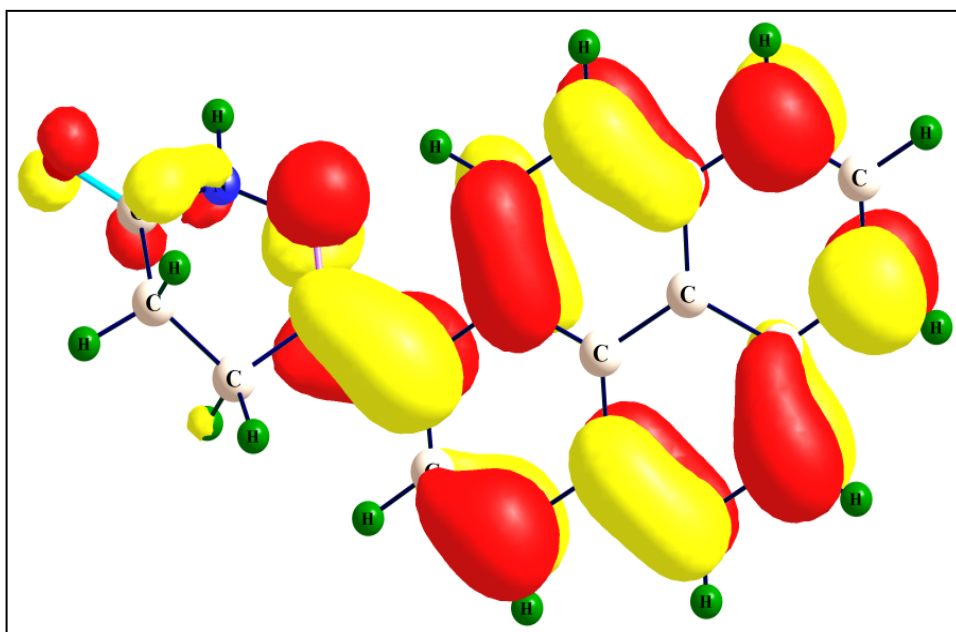

LUMO

**Figure S17.** Plots of the frontier orbitals of Compound (4).
